# Supplementary material
Source: Springer Nature journal article supplement (https://www.springermedizin.de/resource/supplementary/12933_2013_743_MOESM1_ESM.pdf/9538896)

### Total cardiovascular disease

per 1,000 person-years

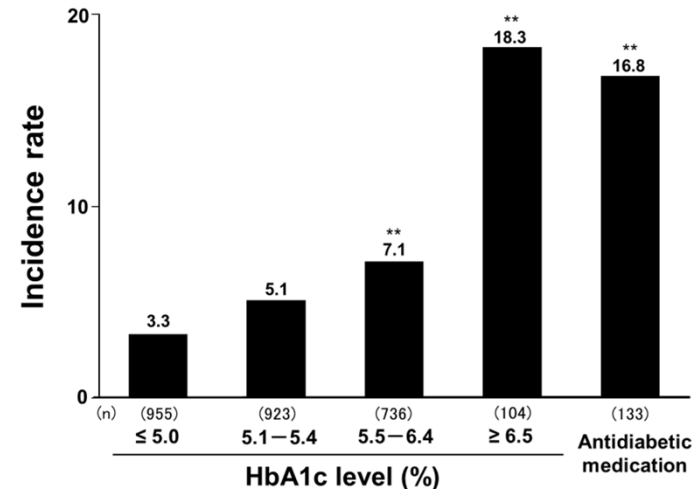

### Coronary heart disease

per 1,000 person-years

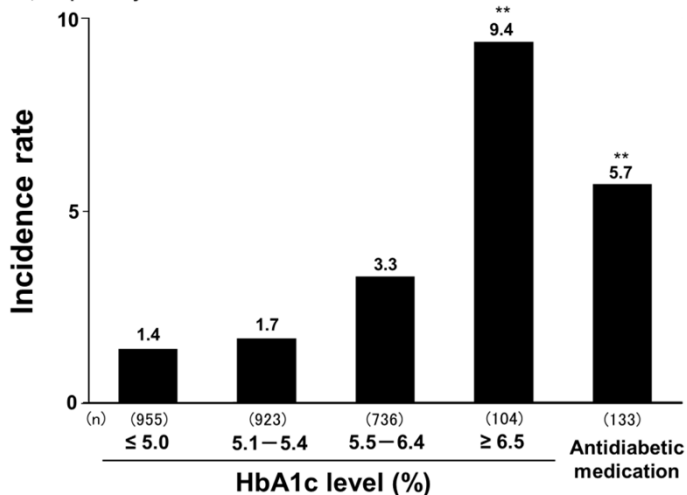

### Ischaemic stroke

per 1,000 person-years

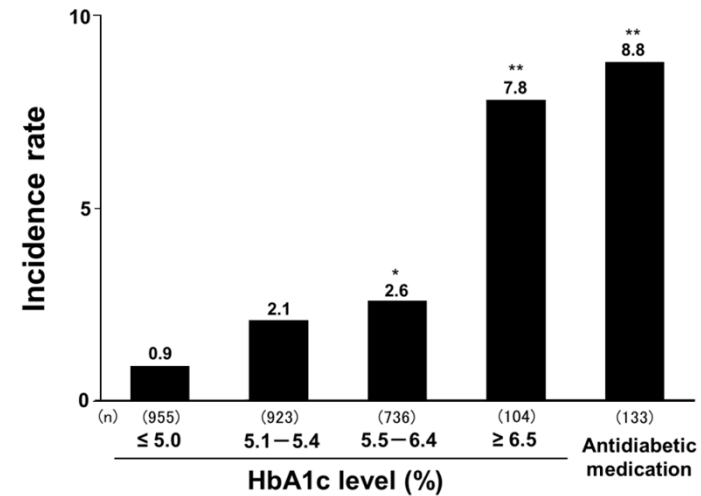

### Haemorrhagic stroke

per 1,000 person-years

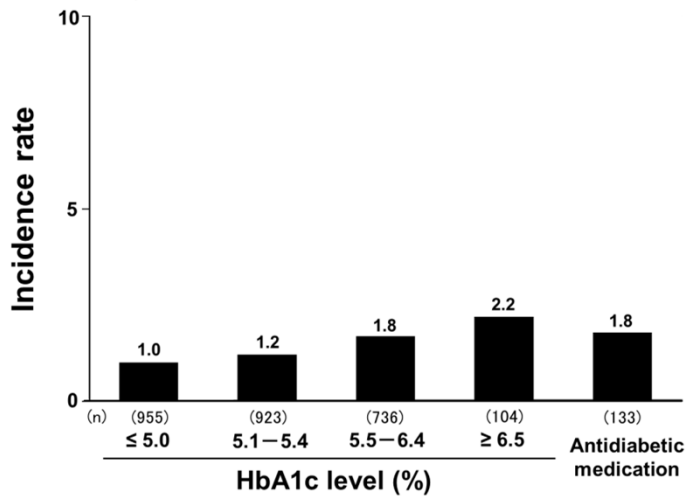

Supplement: MOESM1 [file 9538896]
